# Supplementary material
Source: MDPI journal article supplement (https://www.mdpi.com/2075-4701/6/3/50)
Supplement: s1 [file s1]

# Onset Frequency of Fatigue Effects in Pure Aluminum and 7075 (AlZnMg) and 2024 (AlCuMg) Alloys

Jose I. Rojas <sup>1,\*</sup> and Daniel Crespo <sup>2</sup>

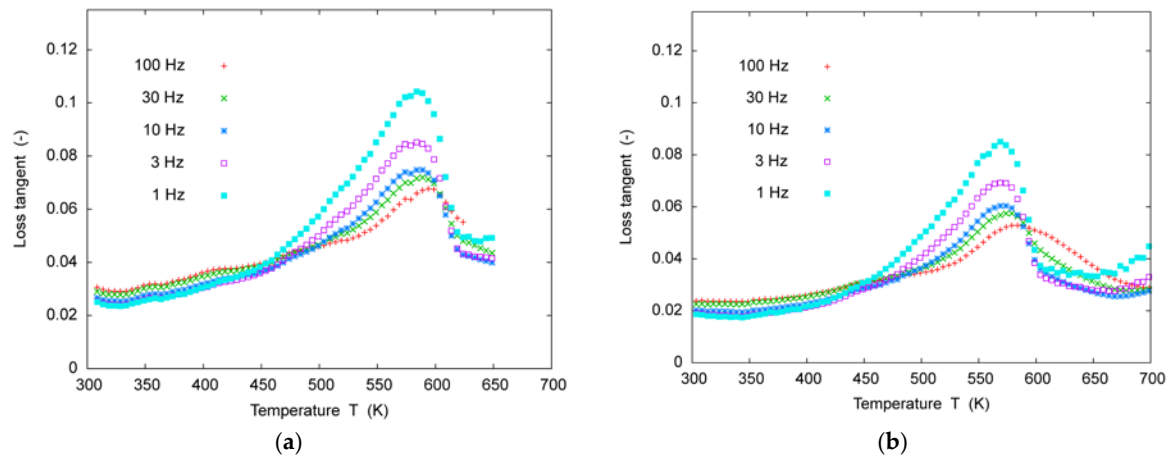

**Figure S1.** (a) Mechanical damping of pure Al in the H24 temper; (b) Mechanical damping of pure Al.
